# Supplementary material for: Uncovering Microbial Composition in Human Breast Cancer Primary Tumour Tissue Using Transcriptomic RNA-seq
Source: MDPI journal article supplement (doi:10.3390/ijms22169058), 2021-08-22

**Figure S1.** Boxplot visualisation of the most frequent taxa prevalence. The graph shows % amounts of bacterial taxa reads out of all bacterial reads in samples of different basic groups. All samples used in the study are included in the graph.

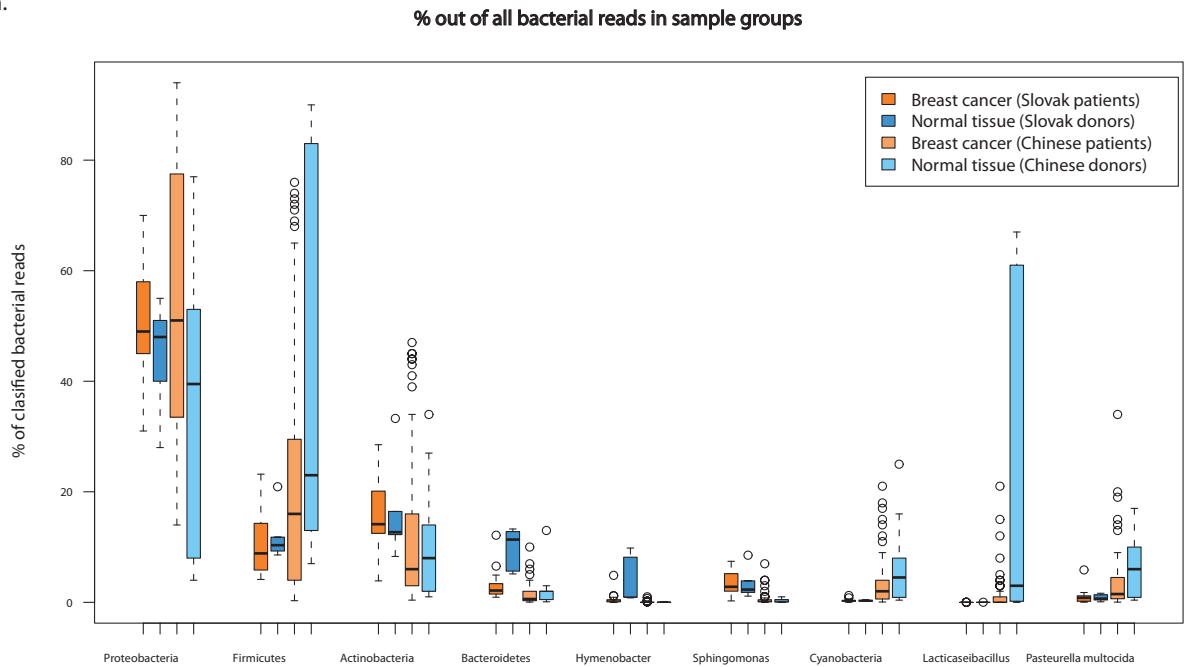

Supplement: s1 [file s1]
