# Supplementary material for: Uncovering Microbial Composition in Human Breast Cancer Primary Tumour Tissue Using Transcriptomic RNA-seq
Source: Int J Mol Sci. 2021 Aug 22;22(16):9058. doi: 10.3390/ijms22169058 (PMC8396677; doi:10.3390/ijms22169058)
Supplement: Supplementary file 1 [file ijms-22-09058-s001.zip › Table_allsamples.xlsx]

## Sheet: Sheet1
Table S1. Numerical values for the most frequent taxa. Abundance (in % of all bacterial reads calculated by Krona evaluation of multiple Kraken2 ouputs) of the most frequent taxa between all basic groups: breast tumour tissue of Slovak patients with breast cancer, normal breast tissue of Slovak donors, breast tumour tis-sue of Chinese patients with breast cancer (SRA study PRJNA553096), normal br…
Sample	Proteobacteria	Firmicutes	Actinobacteria	Bacteroidetes	Hymenobacter	Sphingomonas	Cyanobacteria	Lacticaseibacillus	Pasteurella multocida
BC-Slovak (sample_4)	67	5.36352	12.4856	1.40682	0	5.18766	0.615486	0	0.351706
BC-Slovak (sample_28)	58	5.58979	19.6359	2.91433	0.23888	4.39539	0.812191	0	0.955519
BC-Slovak(sample_30)	47	18.6157	11.8882	2.58039	0.322549	2.9951	0.184314	0	1.24412
BC-Slovak (sample_36)	51	12.9201	13.922	4.93365	0.255189	2.75037	0.283543	0	1.18143
BC-Slovak (sample_9)	58	13.6243	13.2149	2.29725	0.363922	2.50196	0.318431	0	1.02353
BC-Slovak (sample_29)	61	6.00518	19.5432	1.8437	0.263385	7.42746	0.368739	0	0.579447
BC-Slovak (sample_37)	45	4.14088	3.88393	1.28634	0.0934385	0.261628	0.0155731	0	5.87884
BC-Slovak (sample_1)	31	16.3206	28.5162	1.83199	0.0146794	0.431575	0.140922	0.00587177	1.12151
BC-Slovak (sample_8)	70	6.21525	13.1839	1.88341	0.125561	5.52466	0.0627803	0	0.690583
BC-Slovak (sample_10)	47	19.5208	20.1214	3.37859	1.20128	2.02716	0.300319	0	0.525559
BC-Slovak (sample_20)	47	8.20702	8.24932	0.930693	0.169217	1.86139	0.211521	0	1.77678
BC-Slovak (sample_7)	64	5.84389	14.2798	1.97938	0	5.18409	0.188513	0	0.0942563
BC-Slovak (sample_14)	37	8.1077	23.8034	6.56163	0.918585	2.87435	0.19838	0.00646891	0.187598
BC-Slovak (sample_41)	34	23.1886	8.99922	12.1309	4.87348	0.686158	0.466235	0.0175938	0.202329
BC-Slovak (sample_42)	51	5.59752	18.4247	1.23014	0.458286	5.87571	0.0418086	0	0.0289444
BC-Slovak (sample_39)	51	14.2911	14.0051	1.49346	0.0794393	2.01776	0.230374	0	0.150935
BC-Slovak (sample_5)	47	9.50507	22.8919	4.13475	1.17719	2.57814	1.24529	0	0.992341
BC-Slovak (sample_6)	45	13.5178	24.1304	2.31225	0.237154	5.03953	0.237154	0	1.77866
Normal-Slovak (sample_43)	48	9.28502	12.2512	12.8019	9.82126	2.30918	0.18599	0	0.101449
Normal-Slovak (sample_38)	51	11.7944	12.6845	5.64194	0.929415	1.80647	0.248717	0	1.34831
Normal-Slovak (sample_31)	40	10.3353	33.2653	5.14577	0.816327	3.89213	0.422741	0	0.670554
Normal-Slovak (sample_33)	55	8.57181	8.306	11.3564	8.16793	8.51762	0.216779	0	1.64391
Normal-Slovak (sample_34)	28	20.9291	16.4447	13.2709	0.934491	1.12544	0.407936	0.00289316	0.428188
BC-Chinese 1	92	2	2	0.5	0	0.2	2	0	1
BC-Chinese 2	21	32	45	0.3	0.02	0.04	0.8	0	0.4
BC-Chinese 3	29	28	41	0.1	0.005	0.2	0.4	0	0.3
BC-Chinese 4	20	35	44	0.05	0	0.04	0.2	0	0.2
BC-Chinese 5	50	13	21	4	0.2	1	5	0	4
BC-Chinese 6	93	2	2	0.06	0	0.1	1	0	0.9
BC-Chinese 7	40	29	7	0.6	0.04	0.3	15	2	9
BC-Chinese 8	54	28	9	1	0	0.3	1	3	0.9
BC-Chinese 9	18	71	3	0.6	0	0.07	4	0.04	2
BC-Chinese 10	14	74	3	0.3	0	0.7	3	2	2
BC-Chinese 11	26	72	0.5	0.06	0.004	0.06	0.06	0	0.04
BC-Chinese 12	29	68	0.7	0.08	0	0.2	0.8	0	0.6
BC-Chinese 13	94	0.8	4	0.2	0	0.04	0.6	0	0.2
BC-Chinese 14	51	25	10	3	0	0.4	6	8	7
BC-Chinese 15	67	7	3	0.4	0.05	0.1	18	0	13
BC-Chinese 16	92	4	2	0.2	0.02	0.07	1	0	0.5
BC-Chinese 17	64	16	11	0.7	0.2	0.3	2	0.7	3
BC-Chinese 18	53	19	20	0.3	0	1	2	0.3	3
BC-Chinese 19	44	26	17	1	0	0	2	4	1
BC-Chinese 20	20	35	44	0.05	0	0.04	0.2	0	0.2
BC-Chinese 21	56	20	13	3	0.03	3	2	2	4
BC-Chinese 22	88	2	6	0.4	0	0.2	2	0	1
BC-Chinese 23	46	8	20	3	1	2	14	0	9
BC-Chinese 24	77	4	4	0.4	0	0.1	0.5	0.2	0.7
BC-Chinese 25	53	19	18	1	0.2	0.7	2	0	15
BC-Chinese 26	49	7	24	4	0.1	0.6	9	0	8
BC-Chinese 27	58	9	13	2	0	1	8	0.2	7
BC-Chinese 28	62	18	10	7	0.009	0.06	0.9	0	0.6
BC-Chinese 29	91	2	3	0.4	0	0.2	0.5	0.03	1
BC-Chinese 30	89	5	3	1	0.02	0.08	1	0	0.7
BC-Chinese 31	33	51	1	0.07	0.003	0.04	11	0	9
BC-Chinese 32	43	6	3	2	0.02	0.02	3	0	4
BC-Chinese 33	83	4	1	0.1	0.03	0	0.4	0	0.2
BC-Chinese 34	20	33	45	0.07	0	0.04	0.2	0	0.2
BC-Chinese 35	42	0.3	1	0.1	0	0.2	0.3	0	0.2
BC-Chinese 36	94	1	3	0.2	0	0.04	0.6	0	0.5
BC-Chinese 37	22	76	0.9	0.2	0	0.1	0.08	0	0.5
BC-Chinese 38	56	25	1	0.8	0	0.2	12	0	20
BC-Chinese 39	78	6	6	5	0	1	2	0	4
BC-Chinese 40	51	14	17	4	0	0.7	7	0.2	5
BC-Chinese 41	71	4	8	10	0	0.3	4	0	3
BC-Chinese 42	16	73	3	0.4	0	0.1	3	3	2
BC-Chinese 43	31	17	39	2	0	0.4	2	0	1
BC-Chinese 44	19	65	0.4	0.6	0	0.07	0.3	0.2	1
BC-Chinese 45	39	28	9	1	0	0.3	17	0.4	14
BC-Chinese 46	29	17	33	2	0.2	0.8	0.9	0.06	3
BC-Chinese 47	30	56	4	0.6	0.03	0.03	4	1	5
BC-Chinese 48	74	17	7	0.3	0.04	0.1	0.4	0.05	0.4
BC-Chinese 49	48	11	34	1	0.02	4	0.8	5	0.7
BC-Chinese 50	36	4	47	1	0.03	4	6	0	5
BC-Chinese 51	93	2	2	0.4	0.04	0.09	2	0	2
BC-Chinese 52	36	10	43	6	0	1	0.5	3	1
BC-Chinese 53	52	10	9	1	0.02	0.3	21	0	19
BC-Chinese 54	14	69	2	0.2	0	0	0.5	2	0.6
BC-Chinese 55	47	30	14	3	0.7	0.4	3	0.4	0.7
BC-Chinese 56	58	16	13	3	0.1	0.3	2	0.5	3
BC-Chinese 57	80	4	3	0.5	0	0.4	9	0	9
BC-Chinese 58	50	18	15	2	0.06	0.8	8	3	7
BC-Chinese 59	71	16	4	2	0	7	0.6	12	0.9
BC-Chinese 60	34	49	3	0.9	0.05	0.1	4	15	4
BC-Chinese 61	53	31	4	0.6	0	0.2	0.7	1	0.6
BC-Chinese 62	64	19	6	0.3	0	0.09	3	4	34
BC-Chinese 63	41	44	6	0.5	0	0.4	0.9	21	1
BC-Chinese 64	90	2	3	0.9	0.02	0.4	0.8	0.1	1
BC-Chinese 65	47	13	20	4	0.1	0.6	8	0.1	6
BC-Chinese 66	49	23	13	2	0.04	0.5	4	1	4
BC-Chinese 67	80	4	12	0.6	0.04	0.2	2	0	2
BC-Chinese 68	87	6	2	0.5	0	0.1	3	0.09	2
BC-Chinese 69	23	0.6	3	0.04	0	0.1	0.4	0.09	0.3
BC-Chinese 70	91	2	2	4	0	0.1	2	0.1	1
BC-Chinese 71	87	3	4	0.7	0.05	0.3	3	0.3	3
BC-Chinese 72	80	11	3	0.4	0	0.09	0.5	1	0.9
Normal-Chinese 1	4	90	1	0.2	0.02	0.09	0.4	67	0.4
Normal-Chinese 2	21	58	7	0.6	0.01	0.2	8	39	7
Normal-Chinese 3	57	8	11	1	0.09	0	16	0.04	16
Normal-Chinese 4	77	11	2	0.8	0.006	0.08	3	0.0006	7
Normal-Chinese 5	40	34	3	2	0.008	0.07	11	0.2	10
Normal-Chinese 6	37	22	6	2	0	0.7	25	2	17
Normal-Chinese 7	52	14	18	2	0.05	0.5	8	4	8
Normal-Chinese 8	53	9	18	3	0	0.4	0.9	0.7	0.5
Normal-Chinese 9	4	89	1	0.1	0.01	0.02	0.7	66	0.8
Normal-Chinese 10	62	13	14	3	0.02	0.3	5	0	10
Normal-Chinese 11	39	7	34	2	0.04	0.5	11	0.04	10
Normal-Chinese 12	44	36	9	3	0.003	1	4	24	4
Normal-Chinese 13	37	24	13	13	0.1	0.7	7	2	5
Normal-Chinese 14	64	17	12	2	0.1	0.2	2	8	1
Normal-Chinese 15	8	83	2	0.5	0.006	0.02	2	61	2
Normal-Chinese 16	43	14	27	2	0	0.5	6	0.4	12
Normal-Chinese 17	5	88	2	0.3	0.004	0.04	0.9	65	0.9
Normal-Chinese 18	5	88	1	0.3	0.05	0.04	0.5	66	0.4
